# Supplementary material
Source: PubMed Central journal article supplement (PMC4052139)
Supplement: supp_dyu029_ije-2013-04-0404.pdf [file supp_dyu029_ije-2013-04-0404.pdf]

## Appendix

/\* For Stata versions 11 and later \*/

- \* Logistic regression adjusting for confounders
- \* Outcome is "bmi3" – overweight/obese BMI at wave 3
- \* Exposure is low physical activity (inactive = 1)

\*\*\*\*\*

/\* Method 1 – Marginal standardization (standard = TOTAL population) \*/

\* First run logistic regression  
logit bmi3 i.inactive age18 female white diet bmi2, or

\* Estimate prevalence difference for inactive = 1 vs. inactive = 0  
margins inactive, contrast(effects)

\* Alternative syntax  
margins inactive, dydx(inactive)

\* Predicted probabilities by exposure level  
margins inactive, post

\* Estimate prevalence ratio for inactive = 1 vs. inactive = 0  
margins, coeflegend  
nlcom (ratio1: \_b[1.inactive]/\_b[0bn.inactive]), post  
test ratio1 = 1

/\* Gives appropriate p value for comparing ratio1 to 1 \*/

\*\*\*\*\*

/\* Method 1 – Marginal standardization (standard = EXPOSED population) \*/

\* First run logistic regression  
logit bmi3 i.inactive age18 female white diet bmi2, or

\* Estimate prevalence difference for inactive = 1 vs. inactive = 0  
margins if inactive==1, dydx(inactive)

\* Predicted probabilities by exposure level  
margins inactive, subpop(inactive) post  
/\* subpop option calculates weights based on inactive = 1 (exposed group) \*/

\* Estimate prevalence ratio for inactive = 1 vs. inactive = 0  
margins, coeflegend  
nlcom (ratio1: \_b[1.inactive]/\_b[0bn.inactive]), post  
test ratio1 = 1

/\* Gives appropriate p value for comparing ratio1 to 1 \*/

```
*****
```

```
/* Method 2 – Prediction at the Modes */
```

```
/* Note: User must calculate the mode for each confounder */
```

```
logit bmi3 i.inactive age18 female white diet bmi2, or
```

```
margins inactive, at(age18=1 female=1 white=1 diet=0 bmi2=0) contrast(effects)
```

```
margins inactive, at(age18=1 female=1 white=1 diet=0 bmi2=0) post
```

```
margins, coeflegend
```

```
nlcom (ratio1: _b[1.inactive]/_b[0bn.inactive]), post
```

```
test ratio1 = 1
```

```
*****
```

```
/* Method 3 – Prediction at the Means */
```

```
logit bmi3 i.inactive age18 female white diet bmi2, or
```

```
* atmeans option sets each confounder to its mean value
```

```
margins inactive, atmeans contrast(effects)
```

```
margins inactive, atmeans post
```

```
margins, coeflegend
```

```
nlcom (ratio1: _b[1.inactive]/_b[0bn.inactive]), post
```

```
test ratio1 = 1
```
